# Supplementary material
Source: PubMed Central journal article supplement (PMC7293621)
Supplement: pnas.2002567117.sapp.pdf [file pnas.2002567117.sapp.pdf]

# Figure S2

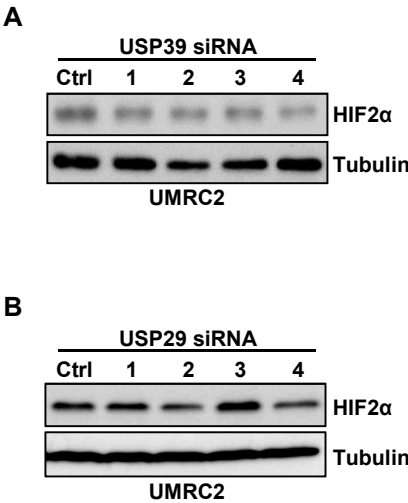

**Figure S2 Effects of knockdown of USP39 or USP29 on HIF2α**

A-B, Immunoblots of lysates from UMRC2 cells transfected with either Ctrl siRNA or siRNA targeting USP39 or USP29.

**Figure S3**

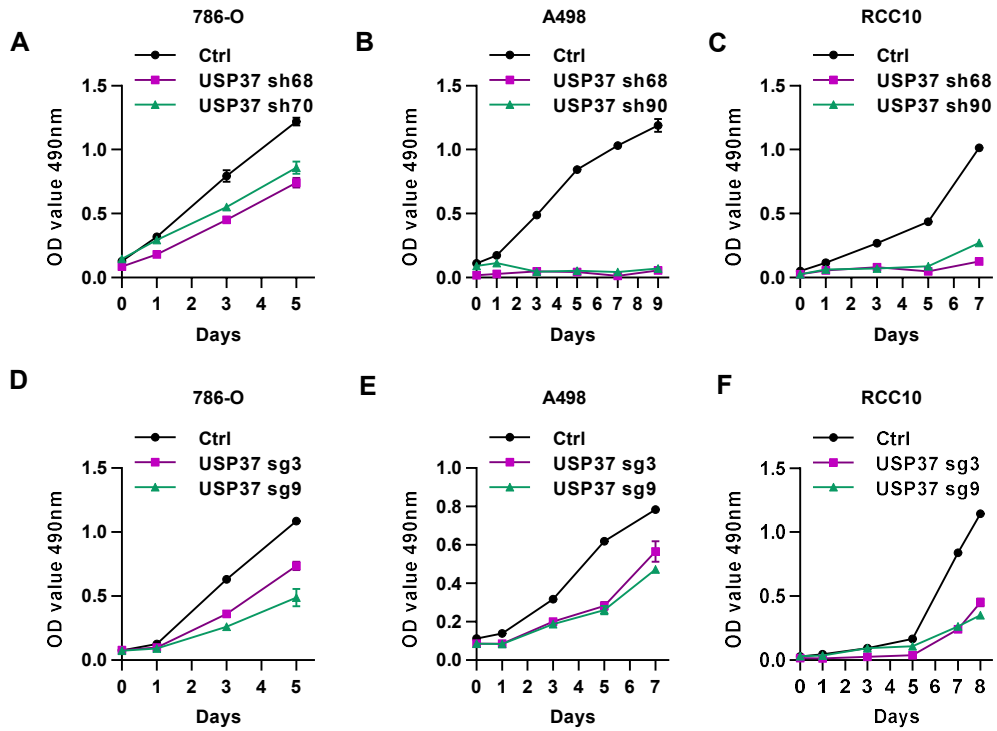

**Figure S3 Loss of USP37 suppresses ccRCC cell growth**

A-C, Proliferation of indicated cells infected with lentivirus containing either Ctrl shRNA or shRNA targeting USP37.

D-F, Proliferation of indicated cells infected with lentivirus containing either Ctrl sgRNA or sgRNA targeting USP37.

**Figure S4**

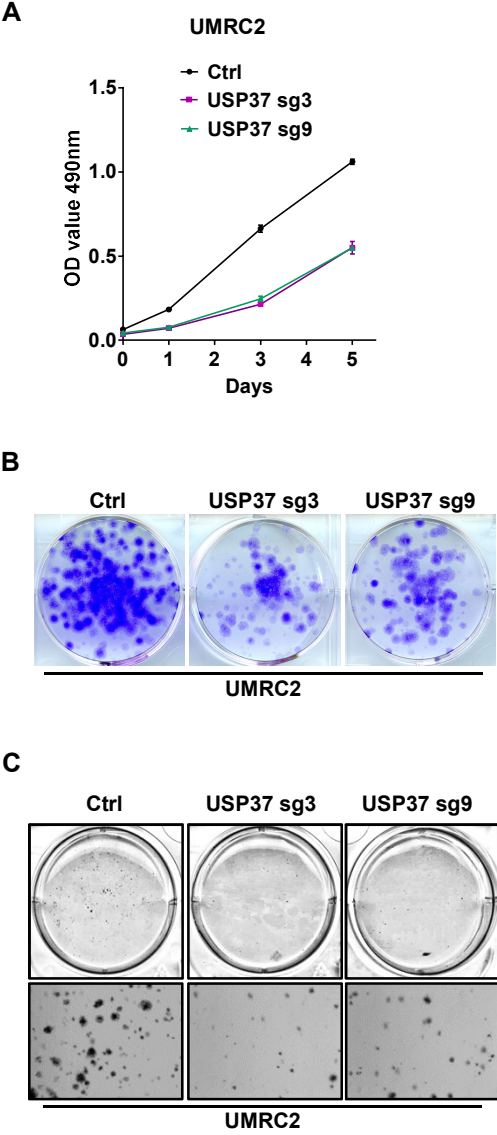

**Figure S4 Loss of USP37 inhibits UMRC2 cell proliferation and 3-D soft agar growth**

A, Proliferation of UMRC2 cells infected with lentivirus containing either Ctrl sgRNA or sgRNA targeting USP37.  
B-C, Representative crystal violet staining and 3-D soft-agar growth pictures of UMRC2 cells infected with either Ctrl sgRNA or sgRNA targeting USP37.

## Figure S5

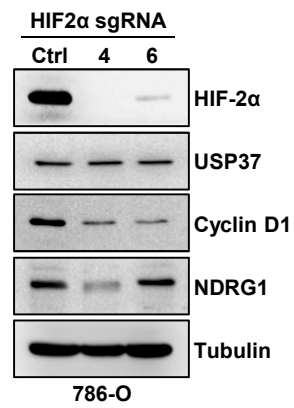

### Figure S5 Validating sgHIF2 $\alpha$ efficiency in 786-O cells

Immunoblots of lysates from 786-O cells infected with either Ctrl sgRNA or sgRNA targeting HIF2 $\alpha$ .
